# Supplementary material
Source: PubMed Central journal article supplement (PMC8900008)
Supplement: NIHMS1779856-supplement-Supplemental_Table_1.pdf [file NIHMS1779856-supplement-Supplemental_Table_1.pdf]

Supplementary Table S1. *Adjusted Odds Ratios of Place of Death.*

| Factor Related to Place of Death | Home vs. Hospital<br>(N = 1,041) |                   | Home vs. NH<br>(N = 809) |                    | Home vs. Hospice<br>(N = 653) |                    | Hospital vs. NH<br>(N = 790) |                     | Hospital vs. Hospice<br>(N = 634) |                    | NH vs. Hospice<br>(N=402) |                   |
|----------------------------------|----------------------------------|-------------------|--------------------------|--------------------|-------------------------------|--------------------|------------------------------|---------------------|-----------------------------------|--------------------|---------------------------|-------------------|
|                                  | CI<br>(N=289)                    | NCI<br>(N=752)    | CI<br>(N=276)            | NCI<br>(N=533)     | CI<br>(N=198)                 | NCI<br>(N=455)     | CI<br>(N=255)                | NCI<br>(N=535)      | CI<br>(N=177)                     | NCI<br>(N=457)     | CI<br>(N=164)             | NCI<br>(N=238)    |
| Age                              |                                  |                   |                          |                    |                               |                    |                              |                     |                                   |                    |                           |                   |
| 65-69                            | 0.57<br>(.09-3.5)                | 0.87<br>(.48-1.6) | 0.78<br>(.11-5.6)        | 4.63<br>(1.1-20.0) | 0.55<br>(.05-6.2)             | 2.31<br>(.53-10.1) | 1.36<br>(.22-8.3)            | 5.30<br>(1.24-22.7) | 0.96<br>(.10-9.5)                 | 2.65<br>(.61-11.5) | 0.71<br>(.06-8.0)         | 0.50<br>(.07-3.6) |
| 70-79                            | 1.01<br>(.51-2.0)                | 1.13<br>(.83-1.5) | 1.42<br>(.67-3.0)        | 2.50<br>(1.6-4.0)  | 1.53<br>(.50-4.7)             | 1.10<br>(.65-1.9)  | 1.41<br>(.65-3.1)            | 2.22<br>(1.37-3.6)  | 1.51<br>(.48-4.7)                 | 0.97<br>(.58-1.7)  | 1.07<br>(.33-3.5)         | 0.44<br>(.23-.83) |
| 80-89                            | 0.84<br>(.53-1.3)                | 0.89<br>(.67-1.2) | 0.83<br>(.51-1.3)        | 0.95<br>(.65-1.4)  | 1.21<br>(.61-2.4)             | 0.97<br>(.60-1.6)  | 0.98<br>(.60-1.6)            | 1.07<br>(.74-1.6)   | 1.43<br>(.72-2.9)                 | 1.09<br>(.67-1.8)  | 1.46<br>(.72-2.9)         | 1.02<br>(.60-1.8) |
| 90+                              | 1.25<br>(.77-2.0)                | 1.08<br>(.74-1.6) | 1.07<br>(.65-1.7)        | 0.37<br>(.25-.56)  | 0.73<br>(.37-1.4)             | 0.76<br>(.42-1.4)  | 0.85<br>(.51-1.4)            | 0.34<br>(.23-.52)   | 0.58<br>(.29-1.2)                 | 0.70<br>(.39-1.3)  | 0.68<br>(.34-1.4)         | 2.05<br>(1.1-3.8) |
| Race                             |                                  |                   |                          |                    |                               |                    |                              |                     |                                   |                    |                           |                   |
| White                            | 1.12<br>(.66-1.9)                | 1.29<br>(.96-1.7) | 0.81<br>(.48-1.4)        | 1.06<br>(.73-1.5)  | 1.17<br>(.54-2.5)             | 1.03<br>(.63-1.7)  | 0.72<br>(.42-1.3)            | 0.82<br>(.57-1.2)   | 1.04<br>(.47-2.3)                 | 0.80<br>(.49-1.3)  | 1.43<br>(.65-3.2)         | 0.98<br>(.57-1.7) |
| Black                            | 0.59<br>(.33-1.1)                | 0.70<br>(.49-1.0) | 0.94<br>(.51-1.7)        | 1.81<br>(1.01-3.3) | 0.80<br>(.34-1.9)             | 0.87<br>(.47-1.6)  | 1.59<br>(.87-2.9)            | 2.58<br>(1.45-4.6)  | 1.35<br>(.58-3.1)                 | 1.24<br>(.67-2.3)  | 0.85<br>(.36-2.0)         | 0.48<br>(.22-1.0) |
| H/L                              | 1.45<br>(.89-2.3)                | 1.06<br>(.76-1.5) | 1.17<br>(.72-1.9)        | 0.61<br>(.41-.90)  | 1.05<br>(.53-2.1)             | 0.91<br>(.53-1.6)  | 0.81<br>(.49-1.4)            | 0.57<br>(.39-.86)   | 0.73<br>(.36-1.5)                 | 0.86<br>(.50-1.5)  | 0.90<br>(.44-1.8)         | 1.50<br>(.83-2.7) |
| Female Gender                    | 0.94<br>(.59-1.5)                | 1.10<br>(.83-1.5) | 0.83<br>(.51-1.4)        | 0.90<br>(.62-1.3)  | 1.14<br>(.58-2.3)             | 1.16<br>(.71-1.9)  | 0.89<br>(.54-1.5)            | 0.81<br>(.56-1.2)   | 1.21<br>(.61-2.4)                 | 1.05<br>(.65-1.7)  | 1.37<br>(.68-2.8)         | 1.29<br>(.75-2.2) |
| Marital Status                   |                                  |                   |                          |                    |                               |                    |                              |                     |                                   |                    |                           |                   |
| M/P                              | 1.39<br>(.81-2.4)                | 0.94<br>(.69-1.3) | 1.54<br>(.88-2.7)        | 2.13<br>(1.37-3.3) | 1.13<br>(.52-2.4)             | 1.09<br>(.65-1.8)  | 1.11<br>(.62-2.0)            | 2.27<br>(1.46-3.5)  | 0.81<br>(.37-1.8)                 | 1.16<br>(.69-2.0)  | 0.73<br>(.33-1.6)         | 0.51<br>(.28-.94) |
| S/D                              | .212<br>(.06-.77)                | 1.32<br>(.81-2.2) | .17<br>(.05-.60)         | 0.90<br>(.50-1.60) | 0.21<br>(.04-1.0)             | 1.56<br>(.64-3.8)  | 0.79<br>(.35-1.8)            | .68<br>(.37-1.2)    | 0.96<br>(.29-3.2)                 | 1.18<br>(.47-2.9)  | 1.22<br>(.38-4.0)         | 1.74<br>(.66-4.6) |
| W                                | 1.01<br>(.62-1.7)                | 0.97<br>(.72-1.3) | 1.01<br>(.61-1.7)        | 0.62<br>(.42-.91)  | 1.11<br>(.54-2.3)             | 1.00<br>(.61-1.7)  | 0.99<br>(.59-1.7)            | 0.64<br>(.43-.94)   | 1.09<br>(.53-2.3)                 | 1.03<br>(.62-1.7)  | 1.10<br>(.53-2.3)         | 1.63<br>(.93-2.9) |
| S/NM                             | 1.08                             | 0.85              | 1.23                     | 0.40               | 2.13                          | 0.23               | 1.14                         | 0.47                | 1.98                              | 0.27               | 1.74                      | 0.58              |

|             |                     |                   |                   |                   |                   |                   |                   |                   |                   |                   |                   |                   |
|-------------|---------------------|-------------------|-------------------|-------------------|-------------------|-------------------|-------------------|-------------------|-------------------|-------------------|-------------------|-------------------|
|             | (.35-3.3)           | (.31-2.4)         | (.38-4.0)         | (.14-1.2)         | (.26-18)          | (.08-.71)         | (.34-3.8)         | (.17-1.3)         | (.23-17)          | (.09-.81)         | (.20-15)          | (.19-1.8)         |
| Used<br>MHB | 14.46<br>(7.4-28.4) | 6.25<br>(4.3-9.1) | 3.36<br>(2.0-5.6) | 2.42<br>(1.6-3.6) | 0.68<br>(.60-.76) | 0.68<br>(.63-.74) | 0.23<br>(.11-.47) | 0.39<br>(.24-.62) | .022<br>(.13-.36) | 0.36<br>(.29-.46) | 0.46<br>(.36-.58) | 0.34<br>(.26-.44) |

*Note:* CI=cognitively impaired; NCI=no cognitive impairment; NH=nursing home; H/L=Hispanic/Latino; M/P=married/partnered; S/D=separated/divorced; W=widowed; S/NM=single, never married; MHB=Medicare Hospice Benefit.
